# Supplementary material for: Efficacy of Duhuo Jisheng Decoction in Treating Ankylosing Spondylitis: Clinical Evidence and Potential Mechanisms
Source: Hindawi journal article supplement (doi:10.1155/2022/3305773), 2022-04-04
Supplement: f1 [file 3305773.f1.zip]

Archive with 2 entries (2 files):
- 3305773.f1/Figure S1-25.pptx
- 3305773.f1/Supplemental Files (1).docx
