# Supplementary material for: Efficacy of Duhuo Jisheng Decoction in Treating Ankylosing Spondylitis: Clinical Evidence and Potential Mechanisms
Source: Hindawi journal article supplement (doi:10.1155/2022/3305773), 2022-04-04
Supplement: f1 [file 3305773.f1.zip › 3305773.f1/Supplemental Files (1).docx]

**Supplementary materials**

| **Table S1.Information of active compounds and corresponding target number of Duhuo Jisheng Decoction** | | | |
| --- | --- | --- | --- |
| Drug | MolId | MolName | Number of targets |
| Bai Shao (Radix Paeoniae Alba) | MOL001919 | (3S,5R,8R,9R,10S,14S)-3,17-dihydroxy-4,4,8,10,14-pentamethyl-2,3,5,6,7,9-hexahydro-1H-cyclopenta[a]phenanthrene-15,16-dione | 2 |
| Bai Shao (Radix Paeoniae Alba) | MOL001924 | paeoniflorin | 3 |
| Bai Shao (Radix Paeoniae Alba) | MOL000211 | Mairin | 1 |
| Bai Shao (Radix Paeoniae Alba) | MOL000358 | beta-sitosterol | 30 |
| Bai Shao (Radix Paeoniae Alba) | MOL000359 | sitosterol | 3 |
| Bai Shao (Radix Paeoniae Alba) | MOL000422 | kaempferol | 56 |
| Bai Shao (Radix Paeoniae Alba) | MOL000492 | (+)-catechin | 11 |
| Chuan Xiong (Rhizoma Chuanxiong) | MOL001494 | Mandenol | 3 |
| Chuan Xiong (Rhizoma Chuanxiong) | MOL002135 | Myricanone | 24 |
| Chuan Xiong (Rhizoma Chuanxiong) | MOL002140 | Perlolyrine | 4 |
| Chuan Xiong (Rhizoma Chuanxiong) | MOL002157 | wallichilide | 4 |
| Chuan Xiong (Rhizoma Chuanxiong) | MOL000359 | sitosterol | 3 |
| Chuan Xiong (Rhizoma Chuanxiong) | MOL000433 | FA | 2 |
| Dang Gui (Radix Angelicae Sinensis) | MOL000358 | beta-sitosterol | 30 |
| Dang Gui (Radix Angelicae Sinensis) | MOL000449 | St+C16:C32igmasterol | 1 |
| Dang Gui (Radix Angelicae Sinensis) | MOL000449 | Stigmasterol | 27 |
| Du Huo (Radix Angelicae Pubescentis) | MOL001941 | Ammidin | 5 |
| Du Huo (Radix Angelicae Pubescentis) | MOL001942 | isoimperatorin | 1 |
| Du Huo (Radix Angelicae Pubescentis) | MOL000358 | beta-sitosterol | 28 |
| Du Huo (Radix Angelicae Pubescentis) | MOL003608 | O-Acetylcolumbianetin | 14 |
| Du Huo (Radix Angelicae Pubescentis) | MOL004777 | Angelol D | 3 |
| Du Huo (Radix Angelicae Pubescentis) | MOL004778 | [(1R,2R)-2,3-dihydroxy-1-(7-methoxy-2-oxochromen-6-yl)-3-methylbutyl] (Z)-2-methylbut-2-enoate | 2 |
| Du Huo (Radix Angelicae Pubescentis) | MOL004780 | Angelicone | 9 |
| Du Huo (Radix Angelicae Pubescentis) | MOL004792 | nodakenin | 3 |
| Du Zhong (Cortex Eucommiae Ulmoidis) | MOL002058 | 40957-99-1 | 10 |
| Du Zhong (Cortex Eucommiae Ulmoidis) | MOL000211 | Mairin | 1 |
| Du Zhong (Cortex Eucommiae Ulmoidis) | MOL000358 | beta-sitosterol | 30 |
| Du Zhong (Cortex Eucommiae Ulmoidis) | MOL000422 | kaempferol | 56 |
| Du Zhong (Cortex Eucommiae Ulmoidis) | MOL004367 | olivil | 4 |
| Du Zhong (Cortex Eucommiae Ulmoidis) | MOL000443 | Erythraline | 18 |
| Du Zhong (Cortex Eucommiae Ulmoidis) | MOL005922 | Acanthoside B | 1 |
| Du Zhong (Cortex Eucommiae Ulmoidis) | MOL006709 | AIDS214634 | 6 |
| Du Zhong (Cortex Eucommiae Ulmoidis) | MOL007059 | 3-beta-Hydroxymethyllenetanshiquinone | 17 |
| Du Zhong (Cortex Eucommiae Ulmoidis) | MOL000073 | ent-Epicatechin | 6 |
| Du Zhong (Cortex Eucommiae Ulmoidis) | MOL007563 | Yangambin | 8 |
| Du Zhong (Cortex Eucommiae Ulmoidis) | MOL009007 | Eucommin A | 1 |
| Du Zhong (Cortex Eucommiae Ulmoidis) | MOL009009 | (+)-medioresinol | 10 |
| Du Zhong (Cortex Eucommiae Ulmoidis) | MOL009015 | (-)-Tabernemontanine | 32 |
| Du Zhong (Cortex Eucommiae Ulmoidis) | MOL009027 | Cyclopamine | 3 |
| Du Zhong (Cortex Eucommiae Ulmoidis) | MOL009029 | Dehydrodiconiferyl alcohol 4,gamma'-di-O-beta-D-glucopyanoside_qt | 12 |
| Du Zhong (Cortex Eucommiae Ulmoidis) | MOL009031 | Cinchonan-9-al, 6'-methoxy-, (9R)- | 34 |
| Du Zhong (Cortex Eucommiae Ulmoidis) | MOL009047 | (+)-Eudesmin | 10 |
| Du Zhong (Cortex Eucommiae Ulmoidis) | MOL009053 | 4-[(2S,3R)-5-[(E)-3-hydroxyprop-1-enyl]-7-methoxy-3-methylol-2,3-dihydrobenzofuran-2-yl]-2-methoxy-phenol | 9 |
| Du Zhong (Cortex Eucommiae Ulmoidis) | MOL009055 | hirsutin_qt | 15 |
| Du Zhong (Cortex Eucommiae Ulmoidis) | MOL009057 | liriodendrin_qt | 1 |
| Du Zhong (Cortex Eucommiae Ulmoidis) | MOL000098 | quercetin | 134 |
| Du Zhong (Cortex Eucommiae Ulmoidis) | MOL002773 | beta-carotene | 18 |
| Du Zhong (Cortex Eucommiae Ulmoidis) | MOL008240 | (E)-3-[4-[(1R,2R)-2-hydroxy-2-(4-hydroxy-3-methoxy-phenyl)-1-methylol-ethoxy]-3-methoxy-phenyl]acrolein | 15 |
| Du Zhong (Cortex Eucommiae Ulmoidis) | MOL011604 | Syringetin | 18 |
| Fang Feng (Radix Saposhnikoviae) | MOL000011 | (2R,3R)-3-(4-hydroxy-3-methoxy-phenyl)-5-methoxy-2-methylol-2,3-dihydropyrano[5,6-h][1,4]benzodioxin-9-one | 16 |
| Fang Feng (Radix Saposhnikoviae) | MOL011730 | 11-hydroxy-sec-o-beta-d-glucosylhamaudol_qt | 6 |
| Fang Feng (Radix Saposhnikoviae) | MOL011732 | anomalin | 7 |
| Fang Feng (Radix Saposhnikoviae) | MOL011737 | divaricatacid | 5 |
| Fang Feng (Radix Saposhnikoviae) | MOL011740 | divaricatol | 16 |
| Fang Feng (Radix Saposhnikoviae) | MOL001941 | Ammidin | 6 |
| Fang Feng (Radix Saposhnikoviae) | MOL011747 | ledebouriellol | 13 |
| Fang Feng (Radix Saposhnikoviae) | MOL011749 | phelloptorin | 5 |
| Fang Feng (Radix Saposhnikoviae) | MOL011753 | 5-O-Methylvisamminol | 21 |
| Fang Feng (Radix Saposhnikoviae) | MOL002644 | Phellopterin | 11 |
| Fang Feng (Radix Saposhnikoviae) | MOL000359 | sitosterol | 3 |
| Fang Feng (Radix Saposhnikoviae) | MOL000173 | wogonin | 41 |
| Fang Feng (Radix Saposhnikoviae) | MOL000358 | beta-sitosterol | 30 |
| Fang Feng (Radix Saposhnikoviae) | MOL001494 | Mandenol | 3 |
| Fang Feng (Radix Saposhnikoviae) | MOL001942 | isoimperatorin | 1 |
| Fang Feng (Radix Saposhnikoviae) | MOL003588 | Prangenidin | 12 |
| Fang Feng (Radix Saposhnikoviae) | MOL007514 | methyl icosa-11,14-dienoate | 1 |
| Fang Feng (Radix Saposhnikoviae) | MOL013077 | Decursin | 15 |
| Fu Ling (Poria Cocos) | MOL000273 | (2R)-2-[(3S,5R,10S,13R,14R,16R,17R)-3,16-dihydroxy-4,4,10,13,14-pentamethyl-2,3,5,6,12,15,16,17-octahydro-1H-cyclopenta[a]phenanthren-17-yl]-6-methylhept-5-enoic acid | 2 |
| Fu Ling (Poria Cocos) | MOL000275 | trametenolic acid | 1 |
| Fu Ling (Poria Cocos) | MOL000279 | Cerevisterol | 1 |
| Fu Ling (Poria Cocos) | MOL000282 | ergosta-7,22E-dien-3beta-ol | 1 |
| Fu Ling (Poria Cocos) | MOL000283 | Ergosterol peroxide | 1 |
| Fu Ling (Poria Cocos) | MOL000296 | hederagenin | 17 |
| Gan Cao (Radix Glycyrrhizae) | MOL001484 | Inermine | 15 |
| Gan Cao (Radix Glycyrrhizae) | MOL001792 | DFV | 11 |
| Gan Cao (Radix Glycyrrhizae) | MOL000211 | Mairin | 1 |
| Gan Cao (Radix Glycyrrhizae) | MOL002311 | Glycyrol | 10 |
| Gan Cao (Radix Glycyrrhizae) | MOL000239 | Jaranol | 13 |
| Gan Cao (Radix Glycyrrhizae) | MOL002565 | Medicarpin | 31 |
| Gan Cao (Radix Glycyrrhizae) | MOL000354 | isorhamnetin | 31 |
| Gan Cao (Radix Glycyrrhizae) | MOL000359 | sitosterol | 3 |
| Gan Cao (Radix Glycyrrhizae) | MOL003656 | Lupiwighteone | 20 |
| Gan Cao (Radix Glycyrrhizae) | MOL003896 | 7-Methoxy-2-methyl isoflavone | 40 |
| Gan Cao (Radix Glycyrrhizae) | MOL000392 | formononetin | 35 |
| Gan Cao (Radix Glycyrrhizae) | MOL000417 | Calycosin | 21 |
| Gan Cao (Radix Glycyrrhizae) | MOL000422 | kaempferol | 56 |
| Gan Cao (Radix Glycyrrhizae) | MOL004328 | naringenin | 35 |
| Gan Cao (Radix Glycyrrhizae) | MOL004805 | (2S)-2-[4-hydroxy-3-(3-methylbut-2-enyl)phenyl]-8,8-dimethyl-2,3-dihydropyrano[2,3-f]chromen-4-one | 11 |
| Gan Cao (Radix Glycyrrhizae) | MOL004806 | euchrenone | 9 |
| Gan Cao (Radix Glycyrrhizae) | MOL004808 | glyasperin B | 20 |
| Gan Cao (Radix Glycyrrhizae) | MOL004810 | glyasperin F | 17 |
| Gan Cao (Radix Glycyrrhizae) | MOL004811 | Glyasperin C | 23 |
| Gan Cao (Radix Glycyrrhizae) | MOL004814 | Isotrifoliol | 12 |
| Gan Cao (Radix Glycyrrhizae) | MOL004815 | (E)-1-(2,4-dihydroxyphenyl)-3-(2,2-dimethylchromen-6-yl)prop-2-en-1-one | 19 |
| Gan Cao (Radix Glycyrrhizae) | MOL004820 | kanzonols W | 20 |
| Gan Cao (Radix Glycyrrhizae) | MOL004824 | (2S)-6-(2,4-dihydroxyphenyl)-2-(2-hydroxypropan-2-yl)-4-methoxy-2,3-dihydrofuro[3,2-g]chromen-7-one | 20 |
| Gan Cao (Radix Glycyrrhizae) | MOL004827 | Semilicoisoflavone B | 17 |
| Gan Cao (Radix Glycyrrhizae) | MOL004828 | Glepidotin A | 24 |
| Gan Cao (Radix Glycyrrhizae) | MOL004829 | Glepidotin B | 14 |
| Gan Cao (Radix Glycyrrhizae) | MOL004833 | Phaseolinisoflavan | 21 |
| Gan Cao (Radix Glycyrrhizae) | MOL004835 | Glypallichalcone | 27 |
| Gan Cao (Radix Glycyrrhizae) | MOL004838 | 8-(6-hydroxy-2-benzofuranyl)-2,2-dimethyl-5-chromenol | 5 |
| Gan Cao (Radix Glycyrrhizae) | MOL004841 | Licochalcone B | 18 |
| Gan Cao (Radix Glycyrrhizae) | MOL004848 | licochalcone G | 16 |
| Gan Cao (Radix Glycyrrhizae) | MOL004849 | 3-(2,4-dihydroxyphenyl)-8-(1,1-dimethylprop-2-enyl)-7-hydroxy-5-methoxy-coumarin | 22 |
| Gan Cao (Radix Glycyrrhizae) | MOL004855 | Licoricone | 14 |
| Gan Cao (Radix Glycyrrhizae) | MOL004856 | Gancaonin A | 19 |
| Gan Cao (Radix Glycyrrhizae) | MOL004857 | Gancaonin B | 21 |
| Gan Cao (Radix Glycyrrhizae) | MOL004863 | 3-(3,4-dihydroxyphenyl)-5,7-dihydroxy-8-(3-methylbut-2-enyl)chromone | 17 |
| Gan Cao (Radix Glycyrrhizae) | MOL004864 | 5,7-dihydroxy-3-(4-methoxyphenyl)-8-(3-methylbut-2-enyl)chromone | 19 |
| Gan Cao (Radix Glycyrrhizae) | MOL004866 | 2-(3,4-dihydroxyphenyl)-5,7-dihydroxy-6-(3-methylbut-2-enyl)chromone | 15 |
| Gan Cao (Radix Glycyrrhizae) | MOL004879 | Glycyrin | 16 |
| Gan Cao (Radix Glycyrrhizae) | MOL004882 | Licocoumarone | 7 |
| Gan Cao (Radix Glycyrrhizae) | MOL004883 | Licoisoflavone | 18 |
| Gan Cao (Radix Glycyrrhizae) | MOL004884 | Licoisoflavone B | 16 |
| Gan Cao (Radix Glycyrrhizae) | MOL004885 | licoisoflavanone | 19 |
| Gan Cao (Radix Glycyrrhizae) | MOL004891 | shinpterocarpin | 27 |
| Gan Cao (Radix Glycyrrhizae) | MOL004898 | (E)-3-[3,4-dihydroxy-5-(3-methylbut-2-enyl)phenyl]-1-(2,4-dihydroxyphenyl)prop-2-en-1-one | 11 |
| Gan Cao (Radix Glycyrrhizae) | MOL004903 | liquiritin | 6 |
| Gan Cao (Radix Glycyrrhizae) | MOL004904 | licopyranocoumarin | 15 |
| Gan Cao (Radix Glycyrrhizae) | MOL004907 | Glyzaglabrin | 16 |
| Gan Cao (Radix Glycyrrhizae) | MOL004908 | Glabridin | 24 |
| Gan Cao (Radix Glycyrrhizae) | MOL004910 | Glabranin | 10 |
| Gan Cao (Radix Glycyrrhizae) | MOL004911 | Glabrene | 18 |
| Gan Cao (Radix Glycyrrhizae) | MOL004912 | Glabrone | 20 |
| Gan Cao (Radix Glycyrrhizae) | MOL004913 | 1,3-dihydroxy-9-methoxy-6-benzofurano[3,2-c]chromenone | 10 |
| Gan Cao (Radix Glycyrrhizae) | MOL004914 | 1,3-dihydroxy-8,9-dimethoxy-6-benzofurano[3,2-c]chromenone | 9 |
| Gan Cao (Radix Glycyrrhizae) | MOL004915 | Eurycarpin A | 18 |
| Gan Cao (Radix Glycyrrhizae) | MOL004924 | (-)-Medicocarpin | 2 |
| Gan Cao (Radix Glycyrrhizae) | MOL004935 | Sigmoidin-B | 6 |
| Gan Cao (Radix Glycyrrhizae) | MOL004941 | (2R)-7-hydroxy-2-(4-hydroxyphenyl)chroman-4-one | 13 |
| Gan Cao (Radix Glycyrrhizae) | MOL004945 | (2S)-7-hydroxy-2-(4-hydroxyphenyl)-8-(3-methylbut-2-enyl)chroman-4-one | 12 |
| Gan Cao (Radix Glycyrrhizae) | MOL004948 | Isoglycyrol | 6 |
| Gan Cao (Radix Glycyrrhizae) | MOL004949 | Isolicoflavonol | 14 |
| Gan Cao (Radix Glycyrrhizae) | MOL004957 | HMO | 26 |
| Gan Cao (Radix Glycyrrhizae) | MOL004959 | 1-Methoxyphaseollidin | 26 |
| Gan Cao (Radix Glycyrrhizae) | MOL004961 | Quercetin der. | 17 |
| Gan Cao (Radix Glycyrrhizae) | MOL004966 | 3'-Hydroxy-4'-O-Methylglabridin | 26 |
| Gan Cao (Radix Glycyrrhizae) | MOL000497 | licochalcone a | 31 |
| Gan Cao (Radix Glycyrrhizae) | MOL004974 | 3'-Methoxyglabridin | 26 |
| Gan Cao (Radix Glycyrrhizae) | MOL004978 | 2-[(3R)-8,8-dimethyl-3,4-dihydro-2H-pyrano[6,5-f]chromen-3-yl]-5-methoxyphenol | 28 |
| Gan Cao (Radix Glycyrrhizae) | MOL004980 | Inflacoumarin A | 14 |
| Gan Cao (Radix Glycyrrhizae) | MOL004985 | icos-5-enoic acid | 1 |
| Gan Cao (Radix Glycyrrhizae) | MOL004988 | Kanzonol F | 7 |
| Gan Cao (Radix Glycyrrhizae) | MOL004989 | 6-prenylated eriodictyol | 8 |
| Gan Cao (Radix Glycyrrhizae) | MOL004990 | 7,2,4-Trihydroxy-5-methoxy-3-phenylcoumarin | 14 |
| Gan Cao (Radix Glycyrrhizae) | MOL004991 | 7-Acetoxy-2-methylisoflavone | 23 |
| Gan Cao (Radix Glycyrrhizae) | MOL004993 | 8-prenylated eriodictyol | 8 |
| Gan Cao (Radix Glycyrrhizae) | MOL004996 | gadelaidic acid | 1 |
| Gan Cao (Radix Glycyrrhizae) | MOL000500 | Vestitol | 28 |
| Gan Cao (Radix Glycyrrhizae) | MOL005000 | Gancaonin G | 18 |
| Gan Cao (Radix Glycyrrhizae) | MOL005001 | Gancaonin H | 11 |
| Gan Cao (Radix Glycyrrhizae) | MOL005003 | Licoagrocarpin | 27 |
| Gan Cao (Radix Glycyrrhizae) | MOL005007 | Glyasperins M | 24 |
| Gan Cao (Radix Glycyrrhizae) | MOL005008 | Glycyrrhiza flavonol A | 16 |
| Gan Cao (Radix Glycyrrhizae) | MOL005012 | Licoagroisoflavone | 17 |
| Gan Cao (Radix Glycyrrhizae) | MOL005016 | Odoratin | 19 |
| Gan Cao (Radix Glycyrrhizae) | MOL005017 | Phaseol | 13 |
| Gan Cao (Radix Glycyrrhizae) | MOL005018 | Xambioona | 7 |
| Gan Cao (Radix Glycyrrhizae) | MOL005020 | dehydroglyasperins C | 17 |
| Gan Cao (Radix Glycyrrhizae) | MOL000098 | quercetin | 134 |
| Niu Xi (Radix Achyranthis Bidentatae) | MOL001006 | poriferasta-7,22E-dien-3beta-ol | 3 |
| Niu Xi (Radix Achyranthis Bidentatae) | MOL012461 | 28-norolean-17-en-3-ol | 1 |
| Niu Xi (Radix Achyranthis Bidentatae) | MOL001454 | berberine | 16 |
| Niu Xi (Radix Achyranthis Bidentatae) | MOL001458 | coptisine | 8 |
| Niu Xi (Radix Achyranthis Bidentatae) | MOL000173 | wogonin | 41 |
| Niu Xi (Radix Achyranthis Bidentatae) | MOL002714 | baicalein | 35 |
| Niu Xi (Radix Achyranthis Bidentatae) | MOL002776 | Baicalin | 2 |
| Niu Xi (Radix Achyranthis Bidentatae) | MOL002897 | epiberberine | 10 |
| Niu Xi (Radix Achyranthis Bidentatae) | MOL000358 | beta-sitosterol | 30 |
| Niu Xi (Radix Achyranthis Bidentatae) | MOL003847 | Inophyllum E | 8 |
| Niu Xi (Radix Achyranthis Bidentatae) | MOL000422 | kaempferol | 56 |
| Niu Xi (Radix Achyranthis Bidentatae) | MOL004355 | Spinasterol | 3 |
| Niu Xi (Radix Achyranthis Bidentatae) | MOL000449 | Stigmasterol | 28 |
| Niu Xi (Radix Achyranthis Bidentatae) | MOL000785 | palmatine | 17 |
| Niu Xi (Radix Achyranthis Bidentatae) | MOL000085 | beta-daucosterol_qt | 1 |
| Niu Xi (Radix Achyranthis Bidentatae) | MOL000098 | quercetin | 134 |
| Qin Jiao (Radix Gentianae Macrophyllae) | MOL000358 | beta-sitosterol | 30 |
| Qin Jiao (Radix Gentianae Macrophyllae) | MOL000359 | sitosterol | 3 |
| Ren Shen (Panax Ginseng) | MOL002879 | Diop | 3 |
| Ren Shen (Panax Ginseng) | MOL000449 | Stigmasterol | 28 |
| Ren Shen (Panax Ginseng) | MOL000358 | beta-sitosterol | 30 |
| Ren Shen (Panax Ginseng) | MOL003648 | Inermin | 16 |
| Ren Shen (Panax Ginseng) | MOL000422 | kaempferol | 56 |
| Ren Shen (Panax Ginseng) | MOL005308 | Aposiopolamine | 7 |
| Ren Shen (Panax Ginseng) | MOL005317 | Deoxyharringtonine | 2 |
| Ren Shen (Panax Ginseng) | MOL005318 | Dianthramine | 3 |
| Ren Shen (Panax Ginseng) | MOL005320 | arachidonate | 4 |
| Ren Shen (Panax Ginseng) | MOL005321 | Frutinone A | 14 |
| Ren Shen (Panax Ginseng) | MOL005344 | ginsenoside rh2 | 12 |
| Ren Shen (Panax Ginseng) | MOL005348 | Ginsenoside-Rh4_qt | 2 |
| Ren Shen (Panax Ginseng) | MOL005356 | Girinimbin | 8 |
| Ren Shen (Panax Ginseng) | MOL005376 | Panaxadiol | 1 |
| Ren Shen (Panax Ginseng) | MOL005384 | suchilactone | 15 |
| Ren Shen (Panax Ginseng) | MOL005399 | alexandrin_qt | 1 |
| Ren Shen (Panax Ginseng) | MOL000787 | Fumarine | 26 |
| Sang Ji Sheng (Herba Taxilli) | MOL000359 | sitosterol | 3 |
| Sang Ji Sheng (Herba Taxilli) | MOL000098 | quercetin | 138 |
| Sang Ji Sheng (Herba Taxilli) | MOL000359 | sitosterol | 3 |
| Sang Ji Sheng (Herba Taxilli) | MOL000449 | S+C3181:C3203tigmasterol | 1 |
| Sang Ji Sheng (Herba Taxilli) | MOL000449 | Stigmasterol | 26 |
| Xi Xin (Herba Asari) | MOL012140 | 4,9-dimethoxy-1-vinyl-$b-carboline | 6 |
| Xi Xin (Herba Asari) | MOL012141 | Caribine | 8 |
| Xi Xin (Herba Asari) | MOL001460 | Cryptopin | 26 |
| Xi Xin (Herba Asari) | MOL001558 | sesamin | 21 |
| Xi Xin (Herba Asari) | MOL002962 | (3S)-7-hydroxy-3-(2,3,4-trimethoxyphenyl)chroman-4-one | 26 |
| Xi Xin (Herba Asari) | MOL000422 | kaempferol | 56 |
| Xi Xin (Herba Asari) | MOL009849 | ZINC05223929 | 4 |
| Rou Gui (Cortex Cinnamomi) | MOL000131 | EIC | 10 |
| Rou Gui (Cortex Cinnamomi) | MOL000208 | (+)-Aromadendrene | 26 |
| Rou Gui (Cortex Cinnamomi) | MOL000266 | beta-Cubebene | 7 |
| Rou Gui (Cortex Cinnamomi) | MOL002697 | junipene | 21 |
| Rou Gui (Cortex Cinnamomi) | MOL003522 | (+)-Sativene | 20 |
| Rou Gui (Cortex Cinnamomi) | MOL003538 | (+)-Ledene | 12 |
| Rou Gui (Cortex Cinnamomi) | MOL002003 | (-)-Caryophyllene oxide | 28 |
| Rou Gui (Cortex Cinnamomi) | MOL000057 | DIBP | 56 |
| Rou Gui (Cortex Cinnamomi) | MOL000612 | (-)-alpha-cedrene | 1 |
| Rou Gui (Cortex Cinnamomi) | MOL000675 | oleic acid | 16 |
